# Supplementary material for: Patterns of health-related behaviours among adolescents: a cross-sectional study based on the National Survey of School Health Brazil 2012
Source: PubMed Central journal article supplement — BMJ Open. 2016 Nov 10;6(11):e011571. doi: 10.1136/bmjopen-2016-011571 (PMC5128904; doi:10.1136/bmjopen-2016-011571), 2016-11-10
Supplement: bmjopen-2016-011571_Supplementary-file-2.pdf [file bmjopen-2016-011571_Supplementary-file-2.pdf]

Appendix 2 -Prevalence of risk behaviors (%) among Brazilian adolescents. National Survey of Health among 9th Grade Students (PeNSE, 2012)

| Behaviors (%)                      | Gender | Operationalization |           |          |           |            |            |             |
|------------------------------------|--------|--------------------|-----------|----------|-----------|------------|------------|-------------|
|                                    |        | no                 | 1-2 days  | 3-5 days | 6-9 days  | 10-19 days | 20-29 days | everyday    |
| <b>Substance use</b>               |        |                    |           |          |           |            |            |             |
| Smoking - last 30 days             | Male   | 94.9               | 2.6       | 0.6      | 0.5       | 0.4        | 0.2        | 0.7         |
|                                    | Female | 95.0               | 2.8       | 0.7      | 0.4       | 0.4        | 0.2        | 0.5         |
|                                    | Total  | 94.9               | 2.7       | 0.7      | 0.5       | 0.4        | 0.2        | 0.6         |
| Drinking alcohol - last 30 days    | Male   | 74.8               | 15.1      | 4.4      | 2.4       | 1.8        | 0.9        | 0.7         |
|                                    | Female | 73.1               | 16.7      | 4.6      | 2.4       | 1.8        | 1.0        | 0.4         |
|                                    | Total  | 73.9               | 16.0      | 4.5      | 2.4       | 1.8        | 1.0        | 0.6         |
| <b>Amount of alcohol (Glasses)</b> |        |                    |           |          |           |            |            |             |
|                                    | Male   | 72.8               | < 1 glass | 1 glass  | 2 glasses | 3 glasses  | 4 glasses  | >=5 glasses |
|                                    | Female | 69.6               | 7.2       | 7.1      | 3.7       | 2.6        | 1.7        | 4.9         |
|                                    | Total  | 71.2               | 8.4       | 7.6      | 3.9       | 2.6        | 1.8        | 4.6         |
| <b>Drug use - last 30 days</b>     |        |                    |           |          |           |            |            |             |
|                                    | Male   | 97.2               | 1-2 days  | 3-5 days | 6-9 days  | >=10 days  |            |             |
|                                    | Female | 98.0               | 1.3       | 0.5      | 0.3       | 0.7        |            |             |
|                                    | Total  | 97.6               | 1.2       | 0.3      | 0.2       | 0.3        |            |             |
| <b>Sexual behavior</b>             |        |                    |           |          |           |            |            |             |
| Number of sexual partners          | Male   | 59.9               | 1         | 2        | 3         | 4          | 5          | 6 or more   |
|                                    | Female | 81.7               | 13.9      | 8.2      | 5.0       | 2.9        | 1.9        | 8.2         |
|                                    | Total  | 71.3               | 10.6      | 3.0      | 1.7       | 0.9        | 0.7        | 1.4         |
| Unsafe sex (without condom)        | Male   | 90.7               | 12.2      | 5.5      | 3.2       | 1.9        | 1.3        | 4.7         |
|                                    | Female | 94.8               | no        | yes      |           |            |            |             |

|                           |        | Total     | 7.2         | 2-3 times | 4-5 times | 6-7 times | 8-9 times | 10-11 times | 12 or more times |
|---------------------------|--------|-----------|-------------|-----------|-----------|-----------|-----------|-------------|------------------|
| <b>Aggression</b>         |        | 92.8      | <b>once</b> |           |           |           |           |             |                  |
|                           |        | <b>no</b> |             |           |           |           |           |             |                  |
| Physical fight            | Male   | 72.7      | 13.5        | 7.2       | 2.6       | 1.1       | 0.7       | 0.3         | 2.0              |
|                           | Female | 85.4      | 8.8         | 3.5       | 1.0       | 0.3       | 0.3       | 0.1         | 0.6              |
|                           | Total  | 79.3      | 11.0        | 5.3       | 1.8       | 0.7       | 0.5       | 0.2         | 1.3              |
|                           |        | <b>no</b> | <b>yes</b>  |           |           |           |           |             |                  |
| Bullying                  | Male   | 73.9      | 26.2        |           |           |           |           |             |                  |
|                           | Female | 84.0      | 16.0        |           |           |           |           |             |                  |
|                           | Total  | 79.2      | 20.8        |           |           |           |           |             |                  |
| Fight using gun           | Male   | 91.3      | 8.8         |           |           |           |           |             |                  |
|                           | Female | 95.7      | 4.3         |           |           |           |           |             |                  |
|                           | Total  | 93.6      | 6.4         |           |           |           |           |             |                  |
| Fight using other weapons | Male   | 89.9      | 10.1        |           |           |           |           |             |                  |
|                           | Female | 95.2      | 4.8         |           |           |           |           |             |                  |
|                           | Total  | 92.7      | 7.3         |           |           |           |           |             |                  |

---
